# Supplementary material for: A Cu(ii) coordination polymer-based catalytic sensing system for detecting cysteine and sulfur anions
Source: Royal Society of Chemistry journal article supplement (doi:10.1039/c8ay01480a), 2018-01-01
Supplement: c8ay01480a1.pdf [file c8ay01480a1.pdf]

**Cu(II) coordination polymer-based catalytic sensing system for  
detecting cysteine and sulfur anions**

Xiang-Ying Sun,<sup>\*a</sup> Zhen-FaQin,<sup>a</sup> Jiang-Shan Shen,<sup>a</sup> Xue-Gong Cao,<sup>a</sup> Bin  
Liu and Huai-QianWang<sup>b</sup>

<sup>a</sup> College of Materials Science and Engineering, Huaqiao University, Key  
Laboratory of Molecular Designing and Green Conversions (Fujian  
University), Xiamen 361021, China

<sup>b</sup> College of Engineering, Huaqiao University, Quanzhou 362021, China

## Supporting Information

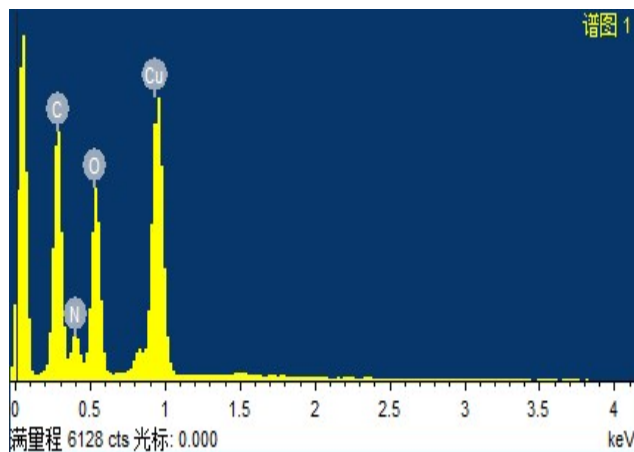

**Fig.S1** EDS of Cu-Asp CP. The contents calculated for Cu-Asp CP were Cu of 33.93, C of 32.83, N of 10.41, O of 22.83, respectively.

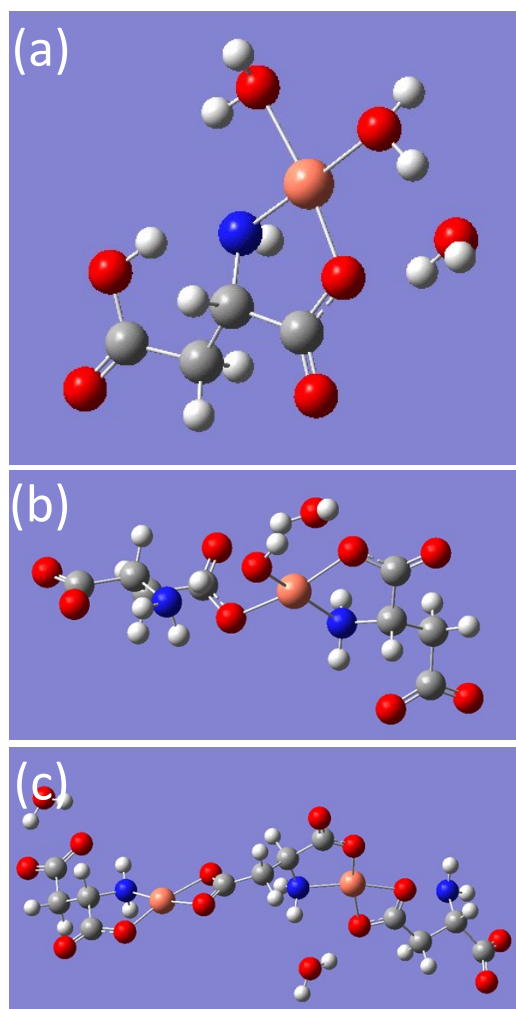

**Fig. S2** The difference between the binding energies of before and after the binding reaction were 35.7949661 eV (a), 19.9081206 eV (b), 16.0552706 eV (c), respectively; the total binding energies of the systems were calculated to be -64757.952eV (a), -76586.188eV (b), -135108.868eV (c), respectively.(a) Cu (Asp) (H<sub>2</sub>O)<sub>3</sub>, (b) Cu (Asp)<sub>2</sub>(H<sub>2</sub>O)<sub>2</sub>, (c) Cu<sub>2</sub>(Asp)<sub>3</sub>(H<sub>2</sub>O)<sub>2</sub>.

B3LYP/6-31+G\* level calculation was performed based on Gaussian 09, referred to the following,

M. J. Frisch, G. W. Trucks, H. B. Schlegel, G. E. Scuseria, M. A. Robb, J. R. Cheeseman, G. Scalmani, V. Barone, B. Mennucci, G. A. Petersson, H. Nakatsuji, M. Caricato, X. Li, H. P. Hratchian, A. F. Izmaylov, J. Bloino, G. Zheng, J. L. Sonnenberg, M. Hada, M. Ehara, K. Toyota, R. Fukuda, J. Hasegawa, M. Ishida, T. Nakajima, Y. Honda, O. Kitao, H. Nakai, T. Vreven, J. A. Montgomery, Jr., J. E. Peralta, F. Ogliaro, M. Bearpark, J. J. Heyd, E. Brothers, K. N. Kudin, V. N. Staroverov, R. Kobayashi, J. Normand, K. Raghavachari, A. Rendell, J. C. Burant, S. S. Iyengar, J. Tomasi, M. Cossi, N. Rega, J. M. Millam, M. Klene, J. E. Knox, J. B. Cross, V. Bakken, C. Adamo, J. Jaramillo, R. Gomperts, R. E. Stratmann, O. Yazyev, A. J. Austin, R. Cammi, C. Pomelli, J. W. Ochterski, R. L. Martin, K. Morokuma, V. G. Zakrzewski, G. A. Voth, P. Salvador, J. J. Dannenberg, S. Dapprich, A. D. Daniels, O. Farkas, J. B. Foresman, J. V. Ortiz, J. Cioslowski, and D. J. Fox, Gaussian, Inc., Wallingford CT, 2009.

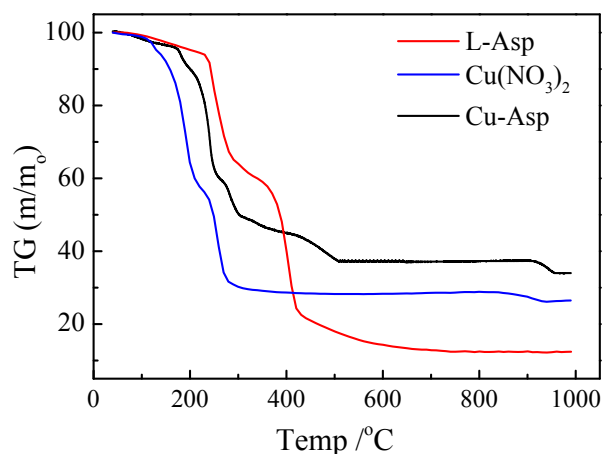

**Fig.S3** TG of Asp (red), Cu(NO<sub>3</sub>)<sub>2</sub> (blue), Cu-Asp CP (black), respectively.

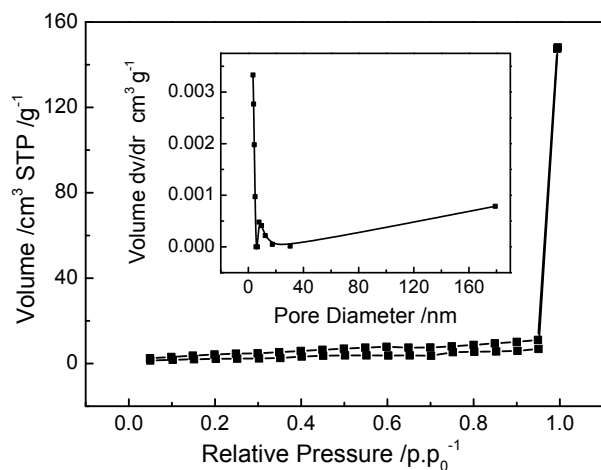

**Fig.S4** N<sub>2</sub> sorption isotherm curve of Cu-Asp CP. The inset shows the corresponding pore size distribution. The specific surface area of the Cu-Asp CP was calculated from N<sub>2</sub> isotherm and was found to be 8.3 m<sup>2</sup>·g<sup>-1</sup>. The corresponding pore size distribution reveals that Cu-Asp CP has small mesopores of *ca.*3.4 nm diameter, determined by using the BJH method.

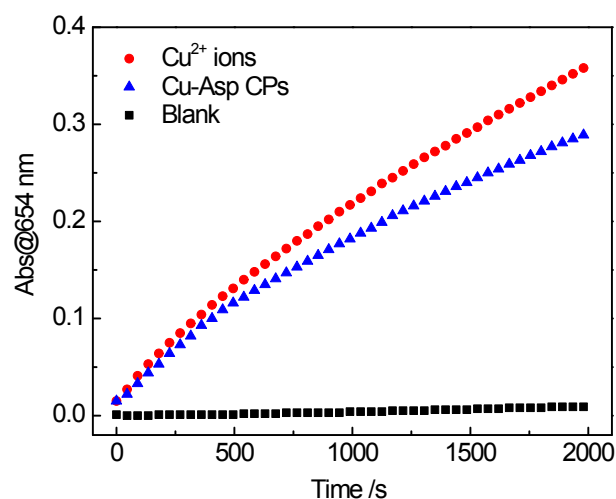

**Fig. S5** Comparison of the peroxidase-like activity of Cu<sup>2+</sup> ions (red) and Cu-Asp CP (blue) towards the TMB-H<sub>2</sub>O<sub>2</sub> system. [Cu<sup>2+</sup> ions] = 69 μM, [Cu-Asp CP] = 69 μM, [TMB] = 0.5 mM, [H<sub>2</sub>O<sub>2</sub>] = 4 mM, 200 mM NaOAc–HOAc buffer solution of pH 4.0, temperature of 30 °C.
